# Supplementary material for: XRCC4-related microcephalic primordial dwarfism: description of a clinical series of 7 cases, phenotype expansion and new diagnostic approaches
Source: Eur J Hum Genet. 2025 Mar 20;33(7):842–51. doi: 10.1038/s41431-025-01821-0 (PMC12229645; doi:10.1038/s41431-025-01821-0)
Supplement: Supplementary file 2 — Supplemental Table 1 [file 41431_2025_1821_MOESM2_ESM.xlsx]

## Sheet: Feuil1
Reference	P1	P2	P3	P4	P5	P6	P7	2014 - Shaheen et al.	2015 - Murray et al.						2015 - Guo ; 2008 - Neilan et al. (patient 3)	2015 - De Bruin et al.		2015 - Bee et al.		2016 - Rosin et al.				2020 - Fredette et al.	PRESENT CASES	%	TOTAL	%	Details
Family	1		2	3	4	5	6	7	8	9	10		11	12	13	14		15		16			17	18	6		18
Patient	1	2	3	4	5	6	7	8	9	10	11	12	13	14	15	16	17	18	19	20	21	22	23	24	7		24
Variant in XRCC4
Chromosomal localization (GRCh37)	chr5-82400865-T-C / chr5-82400865-T-C	chr5-82400865-T-C / chr5-82400865-T-C	chr5-82400762-C- / chr5-82491855-G-A	chr5-82400762-C- / chr5-82554426-C-T	chr5-82400762-C- / chr5-82500668-C-T	chr5-82400775-G-T / chr5-82500668-C-T	chr5-82400762-C- / chr5-82499501-C-T	chr5-82400865-T-C / chr5-82400865-T-C	chr5-82400865-T-C / chr5-82400865-T-C	chr5-82491754-C-T / chr5-82500668-C-T	chr5-82400762-C- / chr5-82554426-C-T	chr5-82400762-C- / chr5-82554426-C-T	chr5-82400762-C- / chr5-82554426-C-T	chr5-82400762-C- / chr5-82400728-G-T	chr5-82554363-G- / chr5-82500668-C-T	chr5-82406953-T-G / chr5-82406953-T-G	chr5-82406953-T-G / chr5-82406953-T-G	chr5-82500668-C-T / chr5-82500668-C-T	chr5-82500668-C-T / chr5-82500668-C-T	chr5-82491755-G-A / chr5-82491755-G-A	chr5-82491755-G-A / chr5-82491755-G-A	chr5-82491755-G-A / chr5-82491755-G-A	chr5-82400762-C- / chr5-82554426-C-T	chr5-82499516-A-T / chr5-82499529-A-G
Chromosomal localization (GRCh38)	chr5-83105046-T-C / 5-83105046-T-C	chr5-83105046-T-C / chr5-83105046-T-C	chr5-83104942-TC-T / chr5-83195936-G-A	chr5-83104942-TC-T / chr5-83258607-C-T	chr5-83104942-TC-T / chr5-83204849-C-T	chr5-83104956-G-T / chr5-83204849-C-T	chr5-82400762-C- / chr5-83203682-C-T	chr5-83105046-T-C / chr5-83105046-T-C	chr5-83105046-T-C / chr5-83105046-T-C	chr5-83195935-C-T / chr5-83204849-C-T	chr5-83104942-TC-T / chr5-83258607-C-T	chr5-83104942-TC-T / chr5-83258607-C-T	chr5-83104942-TC-T / chr5-83258607-C-T	chr5-83104942-TC-T / chr5-83104909-G-T	chr5-83258544-G- / chr5-83204849-C-T	chr5-83111134-T-G / chr5-83111134-T-G	chr5-83111134-T-G / chr5-83111134-T-G	chr5-83204849-C-T / chr5-83204849-C-T	chr5-83204849-C-T / chr5-83204849-C-T	chr5-83195936-G-A / chr5-83195936-G-A	chr5-83195936-G-A / chr5-83195936-G-A	chr5-83195936-G-A / chr5-83195936-G-A	chr5-83104942-TC-T / chr5-83258607-C-T	chr5-83203697-A-T / chr5-83203710-A-G
Coding DNA (NM_003401.5)	c.127T>C / c.127T>C	c.127T>C / c.127T>C	c.25del / c.482G>A	c.25del / c.823C>T	c.25del / c.673C>T	c.37G>T / 673C>T	c.25del / c.613C>T	c.127T>C / c.127T>C	c.127T>C / c.127T>C	c.481C>T / c.673C>T	c.25del / c.823C>T	c.25del / c.823C>T	c.25del / c.823C>T	c.25del / c.-10-1G>T	c.760del / c.673C>T	c.246T>G / c.246T>G	c.246T>G / c.246T>G	c.673C>T / c.673C>T	c.673C>T / c.673C>T	c.482G>A / c.482G>A	c.482G>A / c.482G>A	c.482G>A / c.482G>A	c.25del / c.823C>T	c.628A>T / c.638+3A>G
Protein (p.)	p.(Trp43Arg) / p.(Trp43Arg)	p.(Trp43Arg) / p.(Trp43Arg)	p.(His9ThrfsTer8) / p.(Arg161Gln)	p.(His9ThrfsTer8) / p.(Arg275Ter)	p.(His9ThrfsTer8) / p.(Arg225Ter)	p.(Glu13Ter) / p.(Arg225Ter)	p.(His9ThrfsTer8) / p.(Arg205Ter)	p.(Trp43Arg) / p.(Trp43Arg)	p.(Trp43Arg) / p.(Trp43Arg)	p.(Arg161Ter) / p.(Arg225Ter)	p.(His9ThrfsTer8) / p.(Arg275Ter)	p.(His9ThrfsTer8) / p.(Arg275Ter)	p.(His9ThrfsTer8) / p.(Arg275Ter)	p.(His9ThrfsTer8) / p.?	p.(Asp254MetfsTer66) / p.(Arg225Ter)	p.(Asp82Glu) / p.(Asp82Glu)	p.(Asp82Glu) / p.(Asp82Glu)	p.(Arg225Ter) / p.(Arg225Ter)	p.(Arg225Ter) / p.(Arg225Ter)	p.(Arg161Gln) / p.(Arg161Gln)	p.(Arg161Gln) / p.(Arg161Gln)	p.(Arg161Gln) / p.(Arg161Gln)	p.(His9ThrfsTer8) / p.(Arg275Ter)	p.(Lys210Ter) / p?	2 homozygous / 5 compound heterozygous		11 homozygous / 13 compound heterozygous
Inheritance	Biparental	Biparental	Biparental	Biparental	n.a	Biparental	Biparental	n.a	Biparental	Biparental	Biparental	Biparental	Biparental	Biparental	Biparental	Biparental	Biparental	Biparental	Biparental	Biparental	Biparental	Biparental	Biparental	"In trans"
Diagnostic method	Exome Sequencing	Exome Sequencing	Exome Sequencing	Exome Sequencing	Multigene Panel	Exome Sequencing	Exome Sequencing	Exome Sequencing	Exome Sequencing	Exome Sequencing	Exome Sequencing	Exome Sequencing	Exome Sequencing	Exome Sequencing	Exome Sequencing	Exome Sequencing	Exome Sequencing	Exome Sequencing	Exome Sequencing	Exome Sequencing	Exome Sequencing	Exome Sequencing	Exome Sequencing	n.a
Sanger validation	yes	yes	yes	yes	No	yes	yes	Yes	Yes	Yes	Yes	Yes	Yes	Yes	Yes	Yes	Yes	Yes	Yes	Yes	Yes	Yes	Yes	n.a
Patient
Gender	Male	Female	Female	Male	Female	Male	Male	Female	Male	Male	Male	Male	Male	Male	Female	Male	Female	Male	Male	Male	Male	Male	Female	Female	3F/4M		8F/16M
Age at last assessment	13y	12y	5y	22y	11y 3m	4y 2m	16 WG	4y	3y 1m	2y 9m	8y 4m	4y	9y	5m	23y	40y	36y	50y	50y	14y	10y6m	6m	14y 10m	3m
Country of Origin	Georgia	Georgia	France	France	Germany	New Zealand	European	Saudi Arabia	Saudi Arabia	Morocco	Italy	Italy	France	UK	n.a	Chile	Chile	n.a	n.a	Turkish	Turkish	Turkish	Swiss	n.a
Antenatal, Birth, Neonatal
IUGR	+	+	+	+	+	+	+	+	+	+	+	+	+	+	+	+	+	n.r	n.r	+	+	+	+	+	(7/7)	100	(22/22)	100
Other antenatal abnormality	n.a	-	-	unilateral renal hypoplasia	oligohydramnios	-	transient increase in nuchal translucency (4,9mm at 12 WG)	oligohydramnios	n.r	n.r	n.r	n.r	n.r	n.r	ventriculomegaly	n.r	n.r	n.r	n.r	n.r	n.r	n.r	n.r	oligohydramnios	(3/7)	42.8571	(6/24)	25	oligohydramnios 2/24 ventriculomegaly 1/24 unilateral renal hypoplasia 1/24
Premature delivery	-	+	+	-	+	-	TOP	n.r	-	+	+	-	n.a	+	n.a	n.a	n.a	n.a	n.a	-	-	-	-	+	(3/6)	50	(7/16)	46.6667
Term birth (WG)	39	35	32	37.5	34	37.5	16	n.r	40	32	36	37	n.a	36	n.a	n.a	n.a	n.a	n.a	40	40	40	38	36
Birth weight (g)	1500	1280	1140	2200	1425	2230	n.a	1350	1800	903	1550	1820	2200	1250	n.a	2920	2600	n.a	n.a	n.a	n.a	n.a	n.a	970
SD	-4	-3.3	-2.5	-2.1	-2	-2.5	n.a	-3,9	-4	-3.25	-3	-2.95	-2.16	-3.83	n.a	-1.3	-1.9	n.a	n.a	-5.3	-2.8	-2.4	-3.5	-5.05	-2.73333		-3.04421
Birth length (cm)	36	36	37	44	37	48	crown-rump length 6,3 cm (at 14 WG)	n.a	46	34	39	38	44	35	n.a	45	49	n.a	n.a	n.a	n.a	n.a	n.a	35
SD	-7.5	-6	-2.5	-2.2	-3	-0.5	-4.2	n.a	-2.5	-6.3	-4.49	-5.38	-2.71	-6.56	n.a	-2.8	-2.3	n.a	n.a	-2	n.a	n.a	-2.8	-4.71	-3.7		-3.80278
Birth OFC (cm)	30	26.5	24	28.5	28	30.5	7 (at 14 WG)	n.a	29	24	29	31	28.5	29	n.a	n.a	n.a	n.a	n.a	n.a	n.a	n.a	n.a	25.5
SD	-4	-4.5	-4	-4	-2.2	-2.5	-6	n.a	-5	-4.5	-2.9	-1.83	-4.28	-2.9	n.a	n.a	n.a	n.a	n.a	-3	-3	-3	-3.6	-4.83	-3.88571		-3.66889
Growth
Short stature	+	+	+	+	+	+	n.a	+	+	+	+	+	+	+	+	+	+	+	+	+	+	+	+	+	(6/6)	100	(23/23)	100
Microcephaly	+	+	+	+	+	+	n.a	+	+	+	+	+	+	+	+	+	+	n.a	n.a	+	+	+	+	+	(6/6)	100	(21/21)	100
Weight at last assessment (kg)	16.8	11.5	8.2	37	18	5,8 (at 11m)	n.a	5400	n.a	n.a	n.a	n.a	n.a	n.a	41.4	33	34	n.a	n.a	n.a	n.a	n.a	n.a	1.89
SD	-5	-6	-7	-4	-4.5	-3.8	n.a	-6.3	n.a	n.a	n.a	n.a	n.a	n.a	-4	-6.9	-5.2	n.a	n.a	n.a	n.a	n.a	n.a	-5	-5.05		-5.24545
Height at last assessment (cm)	121.5	104	80	146	105.5	67 (at 11m)	n.a	71	78.7	73.4	130	84	123	49.7	n.a	127.4	137.4	n.a	n.a	n.a	n.a	n.a	n.a	43
SD	-6	-7.5	-7	-5	-6.7	-3.7	n.a	-7.1	-4.7	-5.7	-2.4	-4.5	-1.8	-7.2	n.a	-6.8	-4	n.a	n.a	-5	-5	-3	-2.6	-6.5	-5.98333		-5.11
OFC at last assessment (cm)	43.5	40.2	37.5	47.5	39	40,4 (at 11m)	n.a	36.8	39.8	36.4	46	40.5	45	33	42.5	51.3	50.5	n.a	n.a	n.a	n.a	n.a	n.a	28.7
SD	-8	-10	-9	-7.5	-10.3	-4.4	n.a	-8.3	-8.3	-10.7	-5.6	-8	-5.8	-8.9	-8.5	-3.3	-2.9	n.a	n.a	-7.5	-6.5	-4.5	-5	-11	-8.2		-7.33333
Neurodevelopment
Developmental delay	+	+	+	-	+	+	n.a	+	+	+	-	-	+	n.r	+	n.r	n.r	n.r	n.r	+	+	+	+	n.r	(5/6)	83.3333	(14/17)	82.3529
Intellectual disability	+	+	+	+	+	n.a	n.a	n.r	+	+	-	-	+	n.r	n.a	n.r	n.r	n.r	n.r	+	+	+	+	n.r	(5/5)	100	(12/14)	85.7143
mild	n.a	n.a	n.a	n.a	n.a	n.a	n.a	n.r	-	-	n.r	n.r	-	n.r	n.a	n.r	n.r	n.r	n.r	+	+	+	+	n.r			(5/8)	62.5
moderate	n.a	n.a	n.a	n.a	n.a	n.a	n.a	n.r	+	-	n.r	n.r	+	n.r	n.a	n.r	n.r	n.r	n.r	-	-	-	-	n.r			(2/8)	25
severe	n.a	n.a	n.a	n.a	n.a	n.a	n.a	n.r	-	+	n.r	n.r	-	n.r	n.a	n.r	n.r	n.r	n.r	-	-	-	-	n.r			(1/8)	12.5
Motor developmental delay	-	-	+	-	+	+	n.a	-	n.r	n.r	n.r	n.r	n.r	n.r	n.r	n.r	n.r	n.r	n.r	-	n.r	n.r	-	n.r	(3/6)	50	(3/9)	33.3333
Speech delay	+	+	+	-	+	+	n.a	+	n.r	n.r	n.r	n.r	n.r	n.r	n.r	n.r	n.r	n.r	n.r	+	n.r	n.r	+	n.r	(5/6)	83.3333	(8/9)	88.8889
Feeding difficulties	-	-	+	+	+	-	n.a	n.r	n.r	+	n.r	n.r	n.r	n.r	+	n.r	n.r	n.r	n.r	n.r	n.r	n.r	n.r	n.r	(3/6)	50	(5/23)	21.7391
Gastrostomy	-	-	+	+	+	-	n.a	n.r	n.r	+	n.r	n.r	n.r	n.r	-	n.r	n.r	n.r	n.r	n.r	n.r	n.r	n.r	n.r	(3/6)	50	(4/23)	17.3913
Neurological abnormalities
Tremor	+	-	-	+	-	-	n.a	n.r	n.r	n.r	n.r	n.r	n.r	n.r	-	n.r	n.r	-	-	n.r	n.r	n.r	n.r	n.r	(2/6)	33.3333	(2/23)	8.69565
Ataxia	-	-	-	-	-	-	n.a	n.r	n.r	n.r	n.r	n.r	n.r	n.r	+	n.r	n.r	+	+	n.r	n.r	n.r	n.r	n.r	(0/6)	0	(3/23)	13.0435
Sensory neuropathy	-	-	-	-	-	-	n.a	n.r	n.r	n.r	n.r	n.r	n.r	n.r	+	n.r	n.r	+	+	n.r	n.r	n.r	n.r	n.r	(0/6)	0	(3/23)	13.0435
Pyramidal sign	+	+	-	-	-	-	n.a	n.r	n.r	n.r	n.r	n.r	n.r	n.r	+	n.r	n.r	+	+	n.r	n.r	n.r	n.r	n.r	(2/6)	33.3333	(5/23)	21.7391
Muscle weakness	-	-	-	-	-	-	n.a	n.r	n.r	n.r	n.r	n.r	n.r	n.r	+	n.r	n.r	-	+	n.r	n.r	n.r	n.r	n.r	(0/6)	0	(2/23)	8.69565
Cognitive deterioration	-	-	-	-	-	-	n.a	n.r	n.r	n.r	n.r	n.r	n.r	n.r	-	n.r	n.r	+	+	n.r	n.r	n.r	n.r	n.r	(0/6)	0	(2/23)	8.69565
Seizures	-	-	+	-	-	-	n.a	n.r	n.r	n.r	n.r	n.r	n.r	n.r	-	n.r	n.r	-	-	n.r	n.r	n.r	n.r	n.r	(1/6)	16.6667	(1/23)	4.34783
Brain imaging	Normal	Normal	Normal	mild ventriculomegaly, pituitary hypoplasia, relatively small frontal lobe	Normal	Normal	n.a	n.a	n.r	n.r	n.r	n.r	n.r	n.r	ventriculomegaly, thin corpus callosum, small caudate nuclei	n.r	n.r	mild vermis atrophy	mild vermis atrophy	simplified gyral pattern	n.r	n.r	n.r	n.r	(1/6)	16.6667	(5/24)	20.8333	ventriculomegaly 2/24 vermis atrophy 2/24 thin corpus callosum 1/24 small caudate nuclei 1/24 simplified gyral pattern 1/24 pituitary hypoplasia 1/24
Craniofacial abnormalities
triangular face	+	+	-	+	-	+	n.a	+	n.a	-	n.a	n.a	n.a	+	+	-	+	-	-	+	+	-	+	+	(4/6)	66.6667	(11/19)	57.8947
sloping forehead	+	+	-	+	-	-	n.a	n.r	n.a	-	n.a	n.a	n.a	-	-	-	-	-	-	+	+	+	-	-	(3/6)	50	(6/19)	31.5789
low set ears	+	+	+	+	+	-	n.a	n.r	n.a	-	n.a	n.a	n.a	+	-	-	-	-	-	-	-	-	-	-	(6/6)	100	(6/19)	31.5789
hypotelorism	-	-	-	-	-	-	n.a	n.r	n.a	-	n.a	n.a	n.a	-	-	-	-	+	+	+	+	-	-	-	(0/6)	0	(4/19)	21.0526
deep-set eyes	+	+	+	-	+	-	n.a	n.r	n.a	-	n.a	n.a	n.a	+	+	-	-	-	-	+	+	-	+	-	(4/6)	66.6667	(9/19)	47.3684
prominent beaked nose	+	+	+	-	+	-	n.a	+	n.a	+	n.a	n.a	n.a	-	+	-	-	-	-	+	+	+	-	-	(4/6)	66.6667	(9/19)	47.3684
low columella	+	+	-	+	+	-	n.a	n.r	n.a	-	n.a	n.a	n.a	-	+	-	-	-	-	+	+	+	+	-	(4/6)	66.6667	(9/19)	47.3684
short philtrum	+	+	-	+	+	-	n.a	+	n.a	-	n.a	n.a	n.a	-	+	-	-	-	-	+	+	-	-	-	(4/6)	66.6667	(7/19)	36.8421
dental abnormalities	-	-	+ (small teeth)	+ (oligodontia)	-	-	n.a	n.r	n.a	-	n.a	n.a	n.a	-	-	-	-	-	-	-	-	-	+ (malpositioning)	-	(2/6)	33.3333	(3/19)	15.7895	oligodontia 1/19 microdontia 1/19 malpositioning 1/19
pointed chin	+	+	-	+	-	+	n.a	n.r	n.a	-	n.a	n.a	n.a	+	+	-	-	-	-	+	+	-	+	-	(4/6)	66.6667	(9/19)	47.3684
other							n.a	n.r	n.a	frontal hair implantation	n.a	n.a	n.a	small chin, fine sparse hair			micrognathia			midface hypoplasia			mild truncal obesity	micrognathism
Skeletal abnormalities
5th finger clinodactyly	+	-	-	-	+	-	n.a	n.r	n.r	n.r	n.r	n.r	n.r	n.r	n.r	+	+	n.r	n.r	n.r	n.r	n.r	n.r	+	(2/6)	33.3333	(5/23)	21.7391
delayed bone age	-	-	-	+	+	-	n.a	n.r	n.r	n.r	n.r	n.r	n.r	n.r	n.r	+	n.r	n.r	n.r	n.r	n.r	n.r	n.r	n.r	(2/6)	33.3333	(3/23)	13.0435
2-3 toes syndactyly	-	-	-	+	-	-	n.a	n.r	n.r	n.r	n.r	n.r	n.r	n.r	n.r	n.r	n.r	n.r	n.r	n.r	n.r	n.r	n.r	+	(1/6)	16.6667	(2/23)	8.69565
short 4th and 5th metatarsals	-	+	-	+	+	-	n.a	n.r	n.r	n.r	n.r	n.r	n.r	n.r	n.r	n.r	n.r	n.r	n.r	n.r	n.r	n.r	n.r	n.r	(3/6)	50	(3/23)	13.0435
broad thumbs	-	+	-	-	-	-	n.a	n.r	n.r	n.r	n.r	n.r	n.r	n.r	n.r	n.r	n.r	n.r	n.r	n.r	n.r	n.r	n.r	n.r	(1/6)	16.6667	(1/23)	4.34783
equinovarus feet	-	-	-	-	+	-	n.a	n.r	n.r	n.r	n.r	n.r	n.r	n.r	n.r	n.r	n.r	n.r	n.r	n.r	n.r	n.r	n.r	n.r	(1/6)	16.6667	(1/23)	4.34783
pes cavus	-	-	-	-	-	-	n.a	n.r	n.r	n.r	n.r	n.r	n.r	n.r	n.r	n.r	n.r	+	+	n.r	n.r	n.r	n.r	n.r	(0/6)	0	(2/23)	8.69565
Visceral abnormalities
Cardiac	-	-	-	-	-	-	n.a	n.r	n.r	n.r	n.r	n.r	n.r	n.r	n.r	n.r	n.r	dilated cardiomyopathy since 27y	dilated cardiomyopathy, since 48y	n.r	n.r	n.r	n.r	dilated cardiomyopathy at 2m	(0/6)	0	(3/23)	13.0435	dilated cardiomyopathy 3/3
Renal	-	-	-	left renal hypoplasia but normal function	-	n.r	n.a	n.r	n.r	ectopic kidney, small bilateral kidneys	n.r	n.r	unilateral renal agenesis	n.r	n.r	n.r	n.r	n.r	n.r	n.r	n.r	n.r	n.r	n.r	(1/6)	16.6667	(3/23)	13.0435	hypoplasia 2/23, ectopic kidney 1/23, unilateral agenesis 1/23
Genital	bilateral cryptorchidism	-	-	bilateral cryptorchidism, micropenis	hypoplastic labia minor	-	n.a	n.r	n.r	n.r	n.r	n.r	cryptorchidism	n.r	n.r	bilateral cryptorchidism, micropenis	n.r	bilateral cryptorchidism	bilateral cryptorchidism	n.r	bilateral cryptorchidism	n.r	n.r	n.r	(1/3F ; 2/3M)		Male : 7/15 Female : 1/8	Male : 47% Female : 13%	Male : cryptorchidism 7/15, micropenis 2/15. Female : absent labia minor 1/8
Gastrointestinal	-	-	severe gastroesophageal reflux	-	-	-	n.a	n.r	n.r	n.r	n.r	n.r	n.r	n.r	n.r	n.r	n.r	n.r	n.r	n.r	n.r	inguinal hernia	n.r	n.r	(1/6)	16.6667	(2/23)	8.69565	severe gastroesophageal reflux 1/23, inguinal hernia 1/23
Dermatological abnormalities
acanthosis nicricans	-	-	-	-	+	-	n.a	n.r	n.r	n.r	n.r	n.r	n.r	n.r	n.r	+	+	n.r	n.r	n.r	n.r	n.r	n.r	n.r	(1/6)	16.6667	(3/23)	13.0435
pigmented and depigmented spots	-	-	-	+	-	-	n.a	n.r	n.r	n.r	n.r	n.r	n.r	n.r	n.r	n.r	n.r	n.r	n.r	n.r	n.r	n.r	n.r	n.r	(1/6)	16.6667	(1/23)	4.34783
eczema	-	-	-	-	-	-	n.a	n.r	n.r	n.r	n.r	n.r	n.r	+	n.r	n.r	n.r	n.r	n.r	n.r	n.r	n.r	n.r	n.r	(0/6)	0	(1/23)	4.34783
hands hyperhydrosis	-	-	-	-	+	-	n.a	n.r	n.r	n.r	n.r	n.r	n.r	n.r	n.r	n.r	n.r	n.r	n.r	n.r	n.r	n.r	n.r	n.r	(1/6)	16.6667	(1/23)	4.34783
Hematological abnormalities
Anemia	-	-	+	-	-	-	n.a	n.r	-	-	-	-	-	-	-	+	+	-	-	-	-	-	-	n.r	(1/6)	16.6667	(3/23)	13.0435
Lymphopenia	+	+	+	-	-	-	n.a	n.r	+	-	-	-	-	-	-	+	-	+	-	-	-	-	-	n.r	(3/6)	50	(6/23)	26.087
Neutropenia	-	-	+	-	-	-	n.a	n.r	-	-	-	-	-	-	-	-	-	+	+	-	-	-	-	n.r	(1/6)	16.6667	(3/23)	13.0435
Thrombocytopenia	-	-	+	-	-	-	n.a	n.r	-	-	-	-	-	-	-	-	-	-	-	+	+	-	-	n.r	(1/6)	16.6667	(3/23)	13.0435
Pancytopenia	-	-	+	-	-	-	n.a	n.r	-	-	-	-	-	-	-	-	-	-	-	-	-	-	-	n.r	(1/6)	16.6667	(1/23)	4.34783
Abnormal Ig profile	-	+	n.a	n.a	n.a	n.a	n.a	n.r	-	-	-	-	-	-	-	-	-	-	-	-	-	-	-	n.r	(1/6)	16.6667	(1/23)	4.34783
Clinical immunodeficiency	-	-	+	-	-	-	n.a	n.r	-	-	-	-	-	-	-	-	-	-	-	-	-	-	-	-	(1/6)	16.6667	(1/23)	4.34783
Endocrine disorders
type 2 diabetes / glucose intolerance	-	+	-	+	+	-	n.a	n.r	-	-	-	-	-	-	+	+	+	+	+	-	-	-	-	-	(3/6)	50	(8/23)	34.7826
dyslipidemia	-	+	-	+	+	-	n.a	n.r	-	-	-	-	-	-	-	+	+	+	+	-	-	-	-	-	(3/6)	50	(7/23)	30.4348
hypergonadotropic hypogonadism	-	-	-	+	+	-	n.a	n.r	-	-	-	-	-	-	-	+	+	+	+	-	-	-	-	-	(2/6)	33.3333	(6/23)	26.087
hypothyroidism	-	-	-	-	-	-	n.a	n.r	-	-	-	-	-	-	+	+	-	-	-	-	-	-	-	+	(0/6)	0	(3/23)	13.0435
multinodular goiter	-	-	-	-	-	-	n.a	n.r	-	-	-	-	-	-	-	+	-	-	+	-	-	-	-	-	(0/6)	0	(2/23)	8.69565
hepatic steatosis	-	-	-	+	-	-	n.a	n.r	-	-	-	-	-	-	-	-	-	-	-	-	-	-	-	-	(1/6)	16.6667	(1/23)	4.34783
Sensorial abnormalities
Hearing impairment / Deafness	-	-	-	-	-	-	n.a	n.r	n.r	n.r	n.r	n.r	n.r	n.r	moderate hearing loss	n.r	n.r	n.r	n.r	n.r	n.r	n.r	n.r	n.r	(0/6)	0	(1/23)	4.34783	moderate hearing loss
Visual impairment	-	-	bilateral congenital glaucoma	astigmatism, hyperopia	-	-	n.a	n.r	n.r	n.r	n.r	n.r	n.r	n.r	hyperopia	cataracts	n.r	n.r	n.r	n.r	n.r	n.r	mild strabism	n.r	(2/6)	33.3333	(5/23)	21.7391	bilateral cataract 1/23, bilateral glaucoma 1/23, strabism 1/23, astigmatism 1/23, hyperopia 2/23
History of cancer or neoplasia
	dermatofibrosarcoma	-	-	mandibular osteoid osteoma	-	-	n.a	n.r	-	-	-	-	-	-	thalamic glioma	-	jejunal GIST	-	-	-	-	-	-	-	(2/6)	33.3333	(4/23)	17.3913	dermatofibrosarcome 1/4, mandibular osteoid osteoma 1/4, thalamic glioma 1/4, jejunal GIST
Other
	-	-	-	since childhood: defective thermoregulation with multiple hospitalisations for hypothermia	-	Sacral dimple with borderline low termination of spinal cord	-	n.r	n.r	n.r	n.r	n.r	n.r	n.r	n.r	high-pitched voice	high-pitched voice	n.r	n.r	n.r	n.r	n.r	n.r	cardiopulmonary arrest and death at 6 months of life
(+) : yes ; (-) : no ; (n.a) not available; (n.r) not reported
