# Supplementary material for: XRCC4-related microcephalic primordial dwarfism: description of a clinical series of 7 cases, phenotype expansion and new diagnostic approaches
Source: Eur J Hum Genet. 2025 Mar 20;33(7):842–51. doi: 10.1038/s41431-025-01821-0 (PMC12229645; doi:10.1038/s41431-025-01821-0)
Supplement: Supplementary file 3 — Supplemental Table 2 [file 41431_2025_1821_MOESM3_ESM.xlsx]

## Sheet: Feuil1
	P1		P2
	6 y	13 y	5 y	12 y
Cell count (normal range for sex and age)
Leucocytes (giga/L)	3.61 (5-15)	5.36 (4-10)	4.76 (5-15)	6.27 (4-10)
Lymphocytes (giga/L)	1.38 (2-8)	1.58 (1-4)	1.37 (2-8)	1.37 (1-4)
T-Lymphocytes
CD3+ T-Lymphocytes (cells/µL)	1138 (1400-3700 )	1337 (1000-2200)	1795 (1400-3700)	1026 (1000-2200)
CD4+ T-Lymphocytes (cells/µL)	446 (700-2200)	365 (530-1300)	528 (700-2200)	288 (530-1300)
CD4+ CD45RA+ naive T-Lymphocytes (cells/µL)	53 (430-1500)	59 (230-770)	524 (430-1500)	17 (230-770)
CD8+ T-Lymphocytes (cells/µL)	625 (490-1300)	960 (330-920)	1021 (490-1300)	641 (330-920)
CD4+/CD8+ ratio	0.71 (0.90-2.60)	0.38 (0.90-3.40)	0.53 (0.90-2.90)	0.45 (0.90-3.40)
B-Lymphocytes
CD19+ B-Lymphocytes (cells/µL)	146 (390-1400)	62 (110-570)	443 (390-1400)	24 (110-570)
CD20+ B-Lymphocytes (cells/µL)	145 (390-1400)	59 (110-570)	288 (390-1400)	23 (110-570)
CD21+ B-Lymphocytes (cells/µL)	116 (370-1570)	55 (110-570)	184 (370-1570)	21 (110-570)
Natural Killer NK-Cells
CD3- CD16 and/or CD56+ Lymphocytes (cells/µL)	674 (130-720)	166 (70-480)	1432 (130-720)	175 (70-480)
Quantitative serum immunoglobulin tests
Immunoglobulins G (g/L)	6.58 (5.90-14.30)	8.98 (7.10-15.60)	8.80 (5.90-14.30)	5.99 (7.10-15.60)
Immunoglobulins A (g/L)	0.94 (0.31-2.14)	1.81 (0.65-3.56)	0.60 (0.31-2.14)	0.71 (0.65-3.56)
Immunoglobulins M (g/L)	1.31 (0.45-1.70)	2.43 (0.50-1.80)	1.79 (0.56-2.10)	0.48 (0.66-2.50)
*Values below the minimum threshold are shown in bold.
